# Supplementary material for: Avalanche tuning in bionic MoS2/WS2 transistor for high-frequency visual behavior beyond human retina
Source: Research Square preprint supplement (doi:10.21203/rs.3.rs-3559742/v1), 2024-01-23

**Table of Contents**

**A sense-computing integrated transistor has been developed with superior tunable avalanche effect and exceptional bionic visual function.** Leveraging avalanche tuning operation as feedforward inhibition, the bionic transistor can achieve ultra-fast and high-frequency scotopic and photopic visual adaptation with time-scale of 142 and 427 µs, respectively, that is far beyond human retina function with long adaptation process up to few minutes.


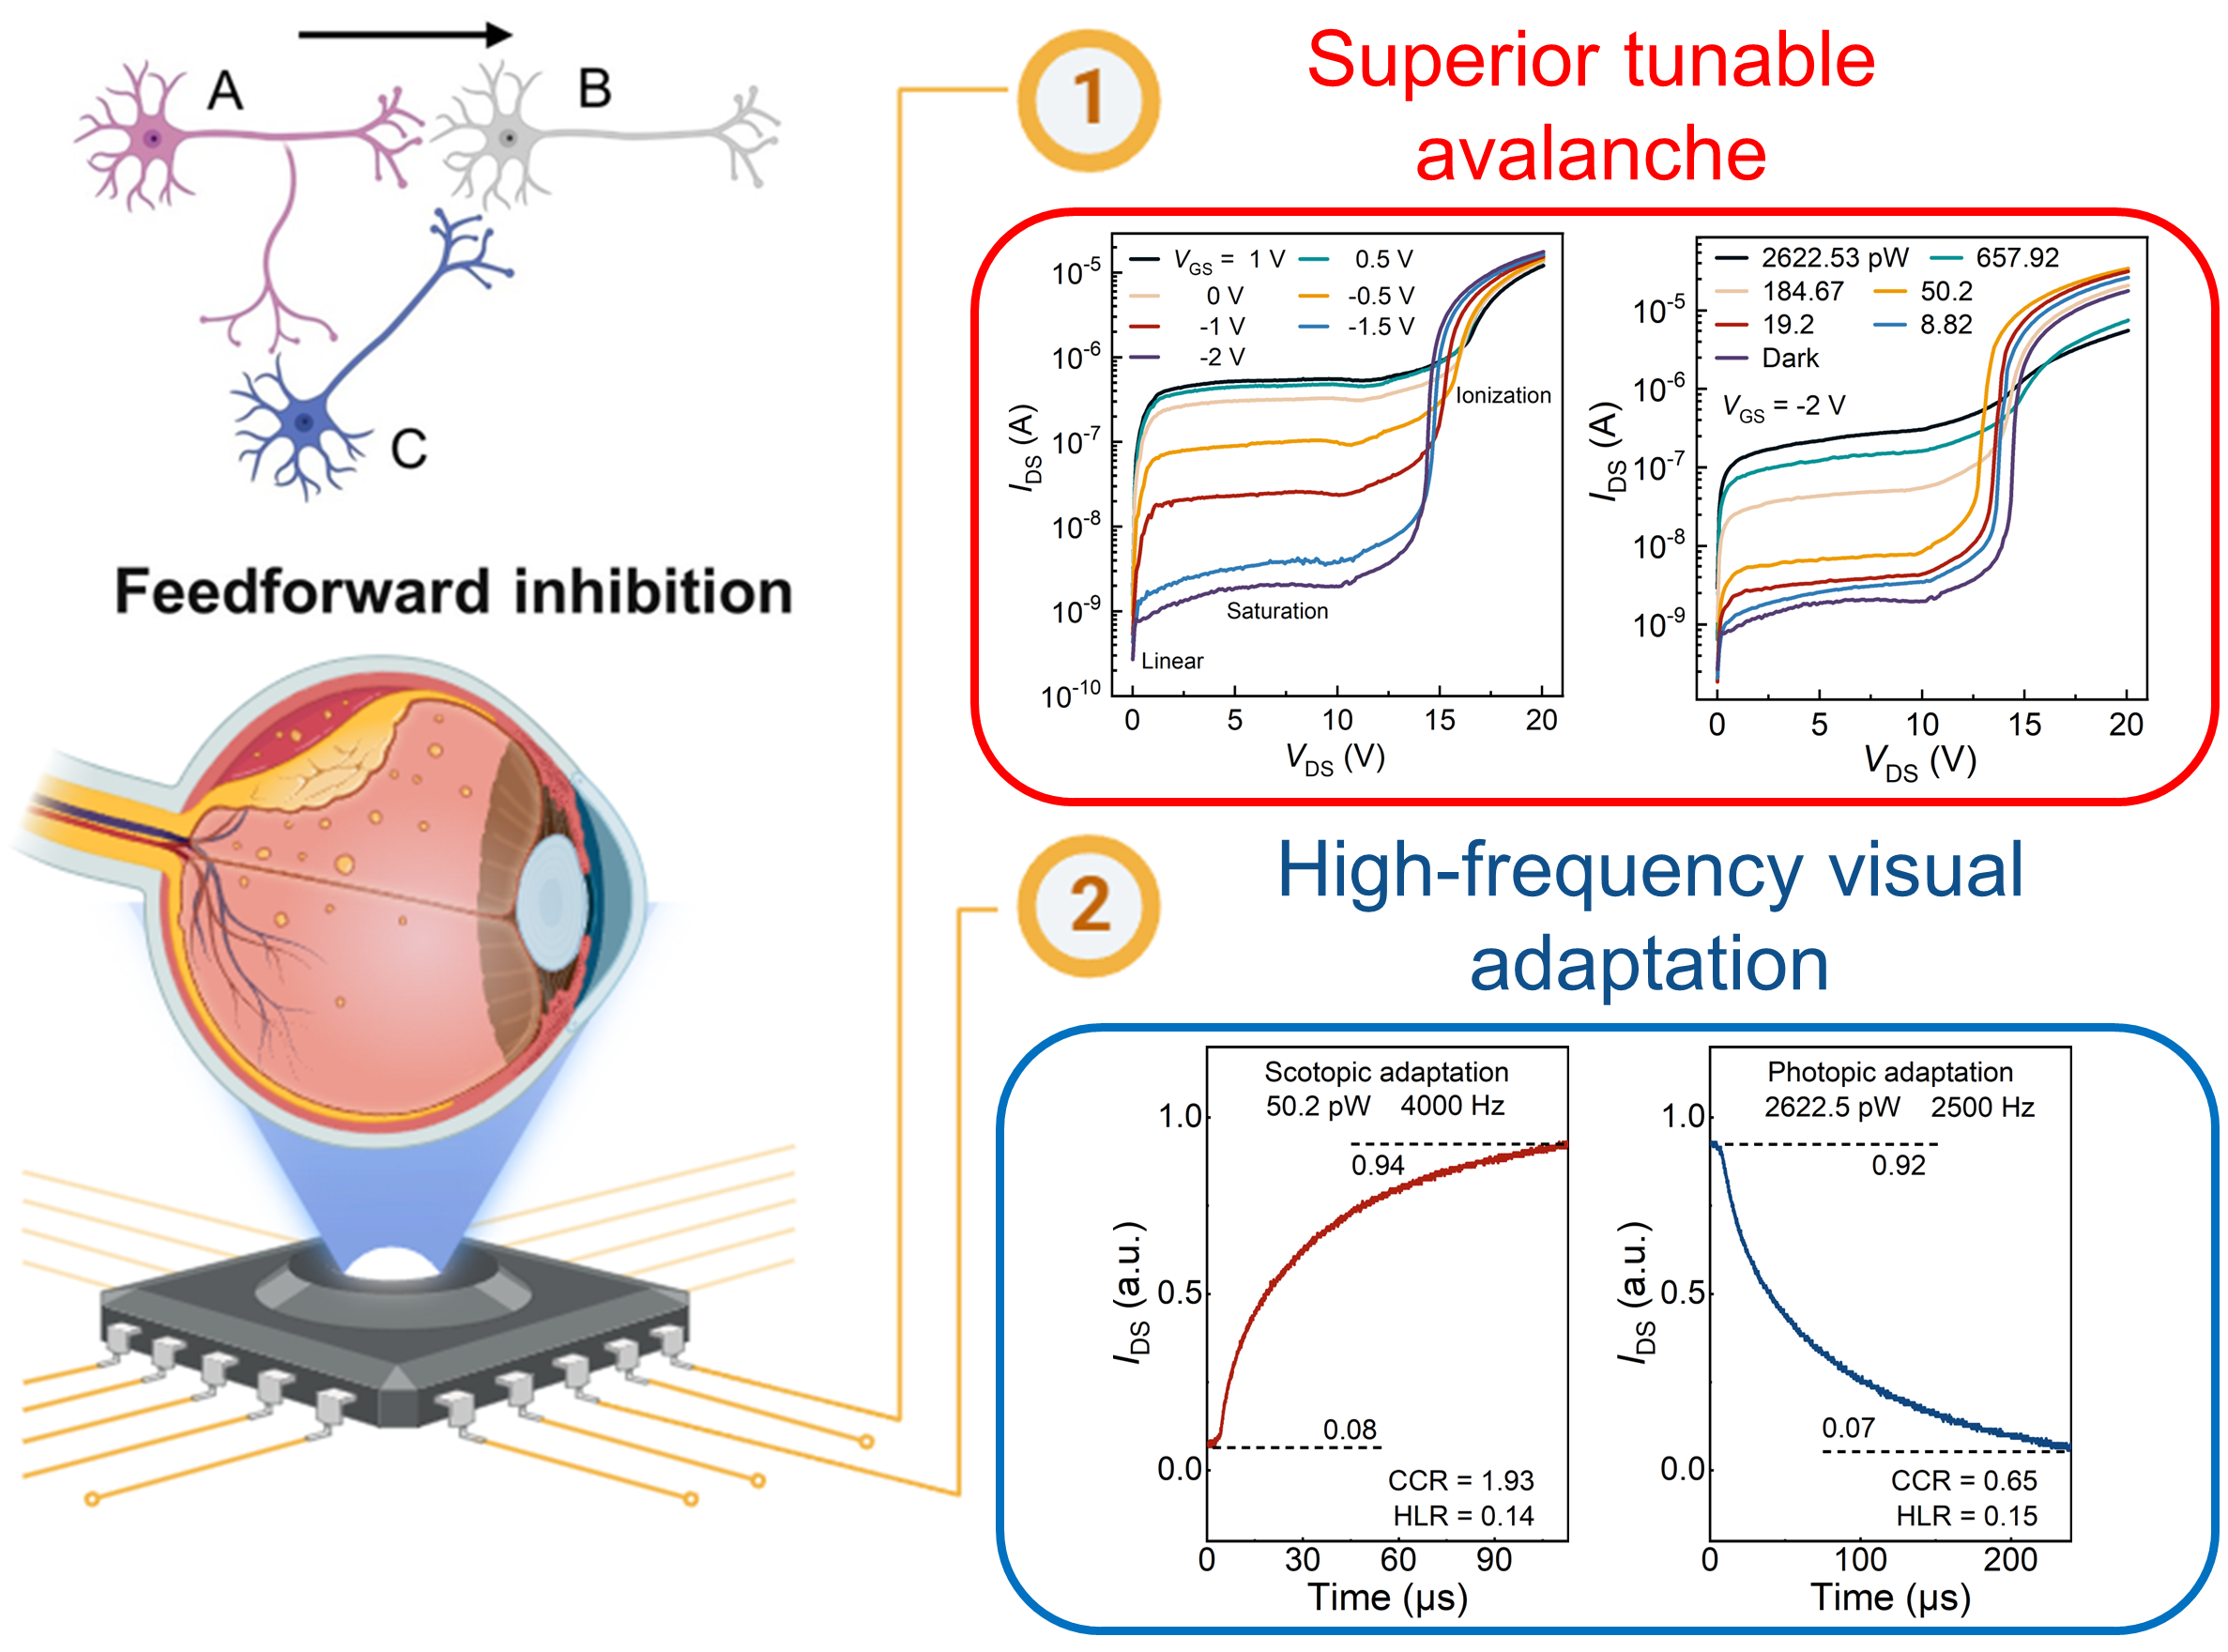

Supplement: Supplementary file 1 [file f923043dc7a8c5869e4cc636.docx]
